# Supplementary material for: Glioma Stem Cells Are Sensitized to BCL-2 Family Inhibition by Compromising Histone Deacetylases
Source: MDPI journal article supplement (doi:10.3390/ijms241813688), 2023-09-05
Supplement: s1 [file s1]

Figure S1

| Gene Mutations       | U87                                                                          | LN229                                                                                       | PDX 12*                                        | PDX 39*                                        | PDX 14*                                        |
|----------------------|------------------------------------------------------------------------------|---------------------------------------------------------------------------------------------|------------------------------------------------|------------------------------------------------|------------------------------------------------|
| <b>TERT</b>          | <u>C228T (-124C&gt;T) TERT promoter mutant (PMID=31068700).</u>              | <u>C2280T (-124C&gt;T) TERT promoter mutant (PMID=31068700).</u>                            | <u>C250T (-146C&gt;T) TERT promoter mutant</u> | <u>C250T (-146C&gt;T) TERT promoter mutant</u> | <u>C228T (-124C&gt;T) TERT promoter mutant</u> |
| <b>RAS pathway</b>   | Heterozygous for NF1 p.Phe1247fs*18 (c.3737_3740delTGTT) (CCLE; Cosmic-CLP). | None detected                                                                               | None detected                                  | None detected                                  | None detected                                  |
| <b>EGFR</b>          | WT (PMID: 24135280)                                                          | WT (PMID: 24135280)                                                                         | WT, amplified                                  | VIII                                           | WT, gain                                       |
| <b>MGMT</b>          | Negative/deficient (PMID: 27423571)                                          | Negative/deficient ( (PMID: 29164620)                                                       | methyated/deficient                            | methyated/deficient                            | unmethyated                                    |
| <b>IDH1 and IDH2</b> | WT (PMID: 32208352)                                                          | WT (PMID: 31242696)                                                                         | WT                                             | WT                                             | WT                                             |
| <b>TP53 Status</b>   | Has no TP53 mutation                                                         | <u>Homozygous for TP53 p.Pro98Leu (c.293C&gt;T). (ClinVar=VCV000528236) PubMed=10416987</u> | None detected                                  | None detected                                  | None detected                                  |
| <b>PTEN</b>          | Homozygous for PTEN c.209+1G>T; splice donor mutation (CCLE; Cosmic-CLP).    | None detected                                                                               | None detected                                  | None detected                                  | None detected                                  |
| <b>LIFR</b>          | None detected                                                                | Heterozygous for LIFR p.Pro1060Ala (c.3178C>G) (Cosmic-CLP)                                 | None detected                                  | None detected                                  | None detected                                  |
| <b>RAD21</b>         | None detected                                                                | Heterozygous for RAD21 p.Gln132Ter (c.394C>T) (Cosmic-CLP)                                  | None detected                                  | None detected                                  | None detected                                  |

Figure S1. PDX and cell cultured adapted GBM lines used in this study. Data for U87 and LN229 are from Cellosaurus

Data for GSCs are from the Mayo Clinic:  
\*<https://www.mayo.edu/research/labs/translational-neuro-oncology/mayo-clinic-brain-tumor-patient-derived-xenograft-national-resource/pdx-characteristics/pdx-phenotype>

A.

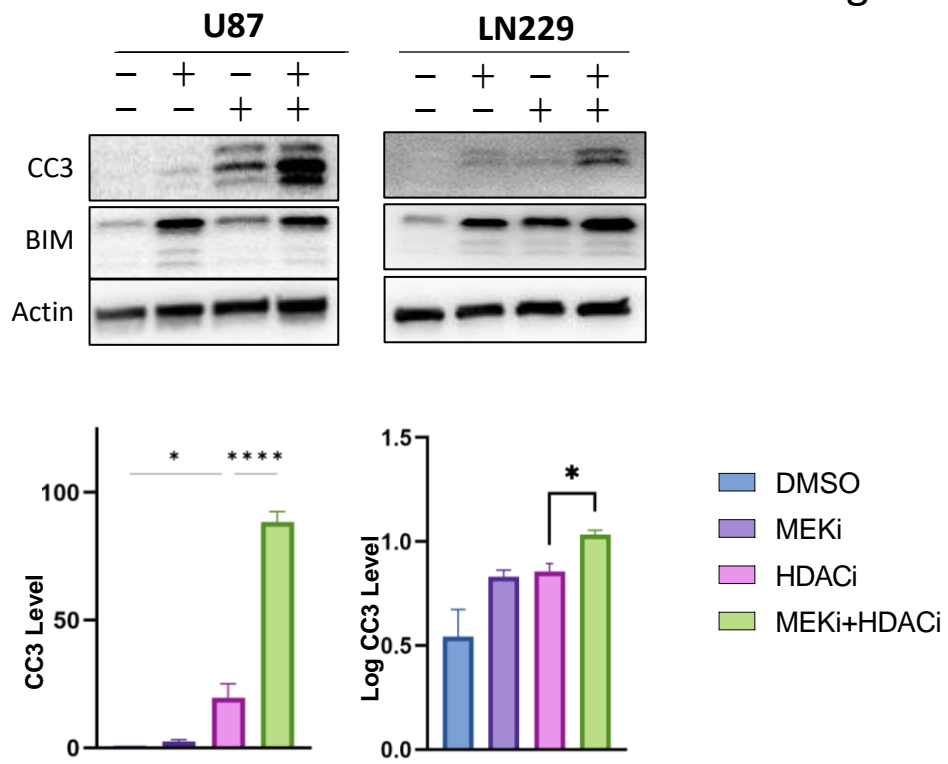

B.

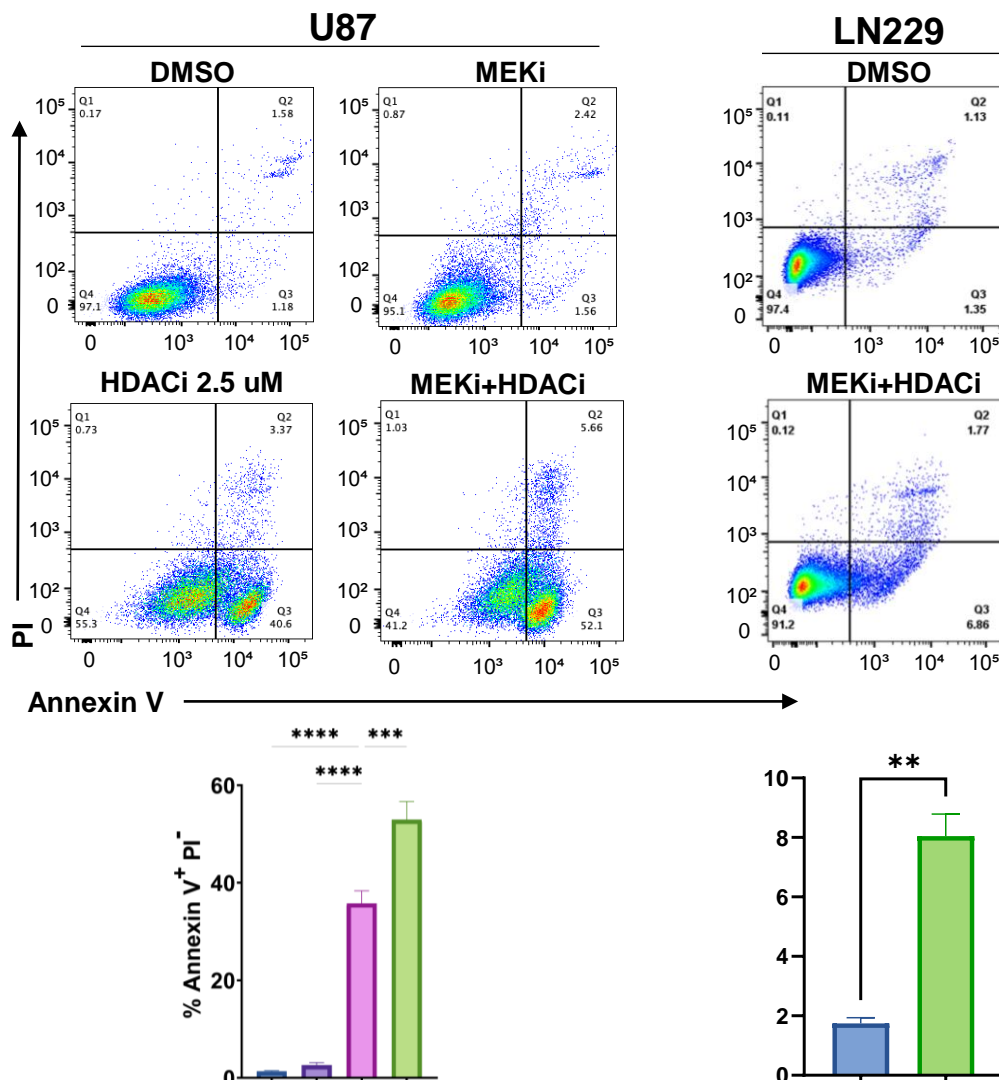

**Figure S2. Combining MEKi and HDACi induces apoptosis in glioma stem cells and cell cultured-adapted glioblastoma.** **A.** Western blot for apoptotic marker cleaved caspase-3 (CC3) in U87 and LN229 cells. Cells were treated for 24 h. U87 were treated with HDACi (2.5  $\mu$ M vorinostat) and MEKi (25 nM trametinib) while LN229 cells were treated with 75 nM trametinib;  $\beta$ -Actin protein was used as a loading control and for normalization. The graphs quantify CC3 expression levels. Data are means  $\pm$  SEM (n=3). **B.** Annexin V-propidium iodide (PI) flow cytometry measuring apoptosis (Annexin V positive/PI negative, Q3) for cells treated as in A. Graphs portray the mean  $\pm$  SEM for the percentage of Annexin V<sup>+</sup>/PI<sup>-</sup> cells from three independent experiments. p = \* $\leq$ 0.05; \*\* $\leq$ 0.01 \*\*\* $\leq$ 0.001 \*\*\*\* $\leq$ 0.0001, t-test.

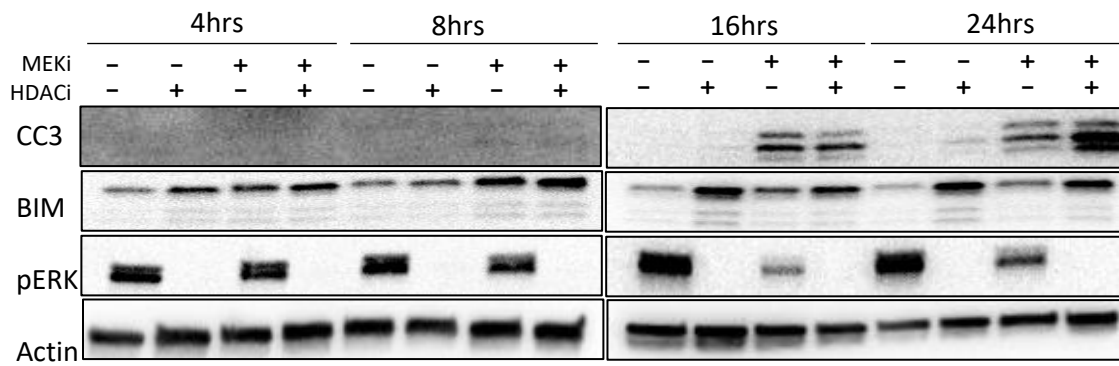

**B.**

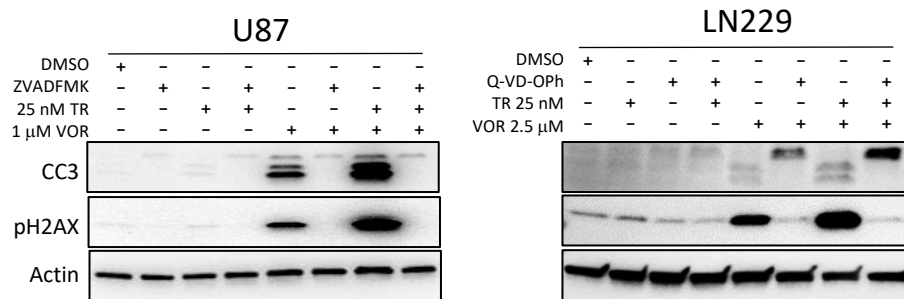

**Figure S3. Time course of CC3 and pH2AX after MEKi+HDACi. A** time course of U87 cells following 24 h incubation with 25 nM TR and/or 2.5  $\mu$ M VOR. **B.** Addition of MEKi + HDACi with or without 50 mM Z-VAD-FMK or Q-VD-OPh.

A.

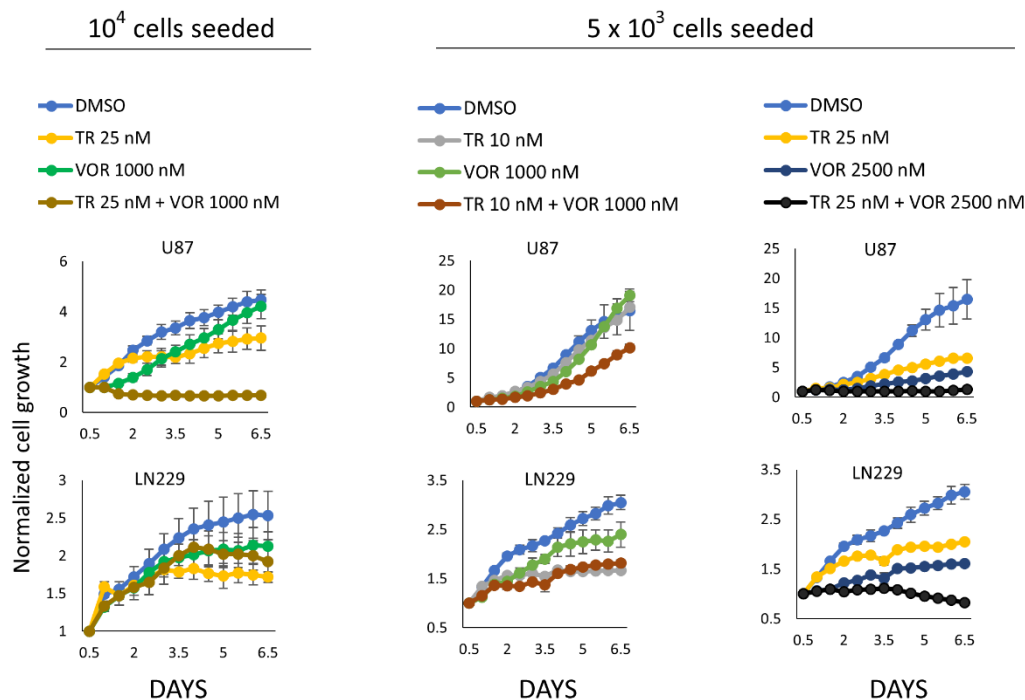

B.

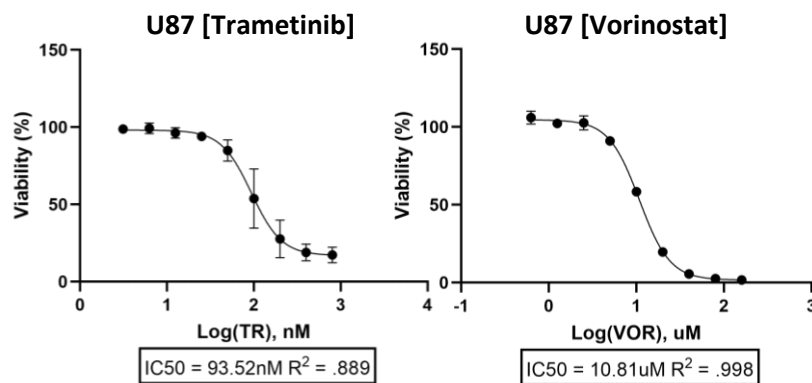

C.

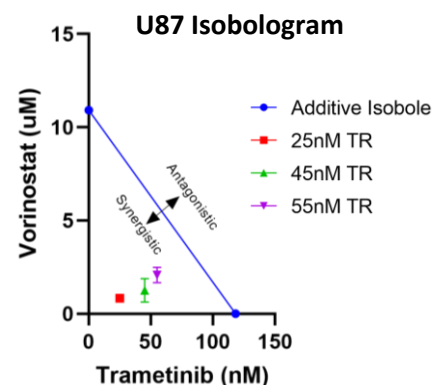

**Figure S4. Combination MEKi + HDACi severely impairs growth and viability of GBM cells.** **A.**  $10^4$  or  $5 \times 10^3$  cells were seeded in 96 well plates and after 12 hours treated with vehicle, or trametinib (TR), vorinostat (VOR) or both followed by automated cell counting using a BioSpa-equipped Cytation 5 for 6.5 days. **B.** Cytotoxicity curves for U87 glioblastoma cells (1,000/well) following 3-day drug incubation with either MEKi by trametinib (TR) or HDACi by vorinostat (VOR). Cell viability measured by luminescence using CellTiterGlo® and normalized to controls such that no drug wells equate to 100% viability. Data are means and SEM ( $n=3$ ). **C.** Isobologram for MEKi (TR) and HDACi (VOR) in U87s at multiple concentrations below the  $IC_{50}$  of TR alone in combination with VOR. Cell viability measured by luminescence using CellTiterGlo® and normalized to controls such that no drug wells equate to 100% viability. Isobole values recorded based on the first measured concentration yielding 50% viability ( $IC_{50}$ ). Data are means + SEM ( $n=3$ ). T = trametinib.

**A.**

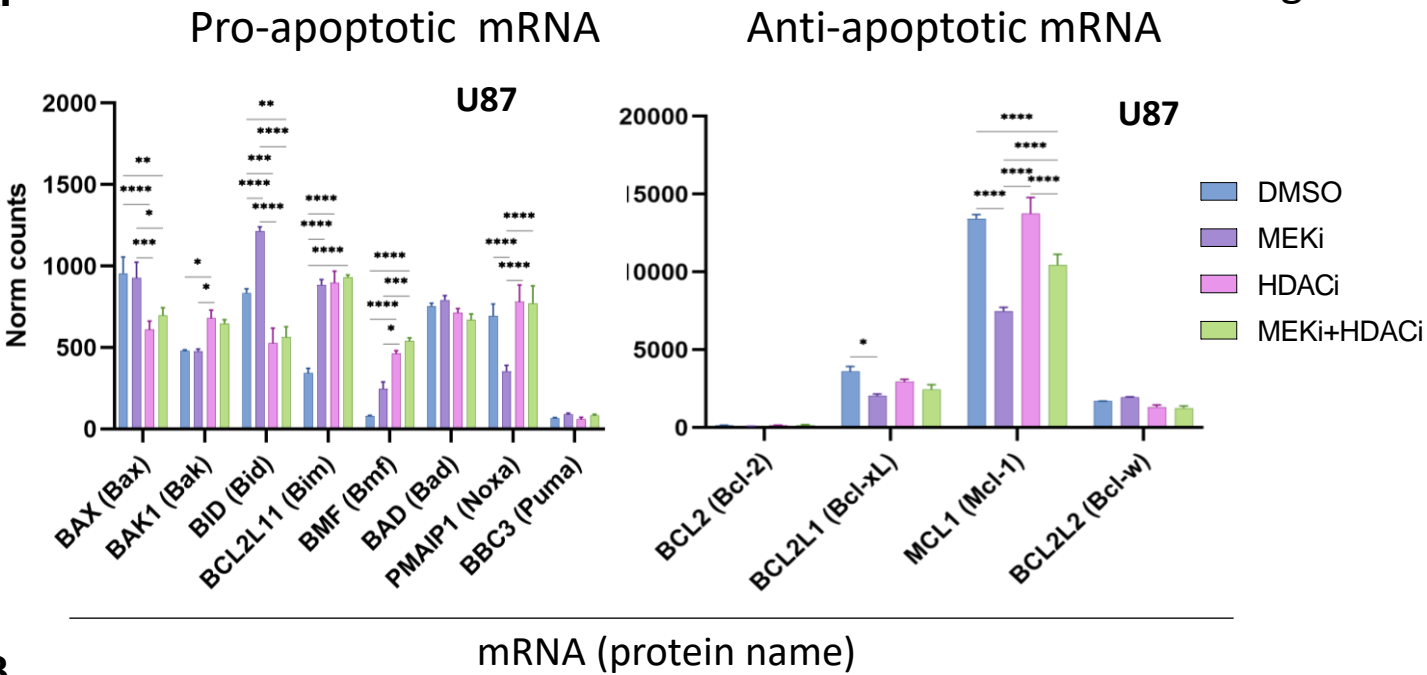

**B.**

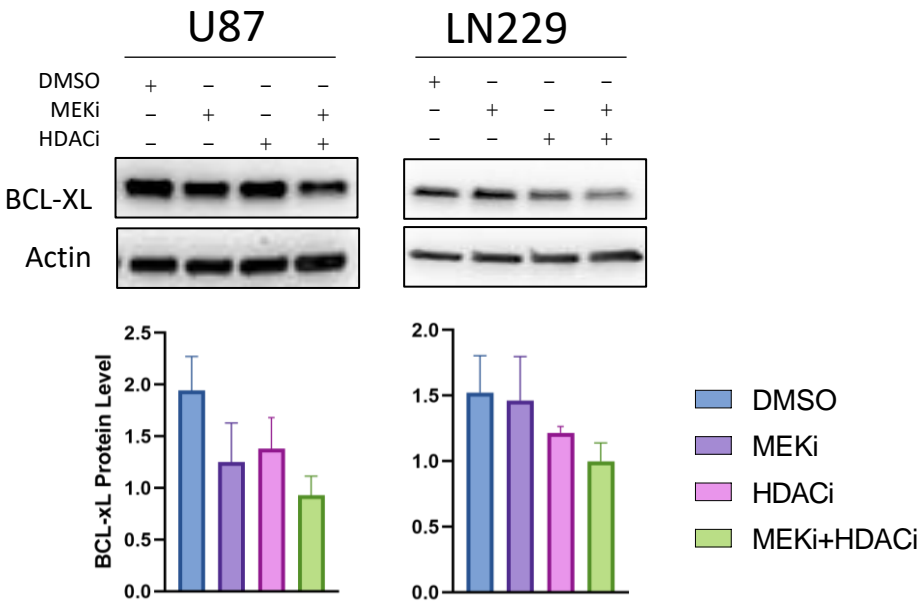

**Figure S5. MEKi+HDACi significantly alters expression of major pro- and anti-apoptotic factors. A.** RNA-sequencing data for pro-apoptotic (left) and anti-apoptotic (right) genes in U87 cells following 24 h incubation with 25 nM TR and/or 2.5  $\mu$ M VOR. Data are means and SEM from three independent experiments. Data are means and SEM (n=3). Significance was tested using a multiple comparison one-way ANOVA \* $\leq$ 0.05; \*\* $\leq$ 0.01 \*\*\* $\leq$ 0.001 \*\*\*\* $\leq$ 0.0001. Multiple comparisons were Tukey's test. **B.** Anti-apoptotic BCL-xL protein expression in U87 (n = 3) and LN229 (n = 2) cells treated as in A. Data are means + SEM.

## A. BIM/BCL2L11 protein

Figure S6

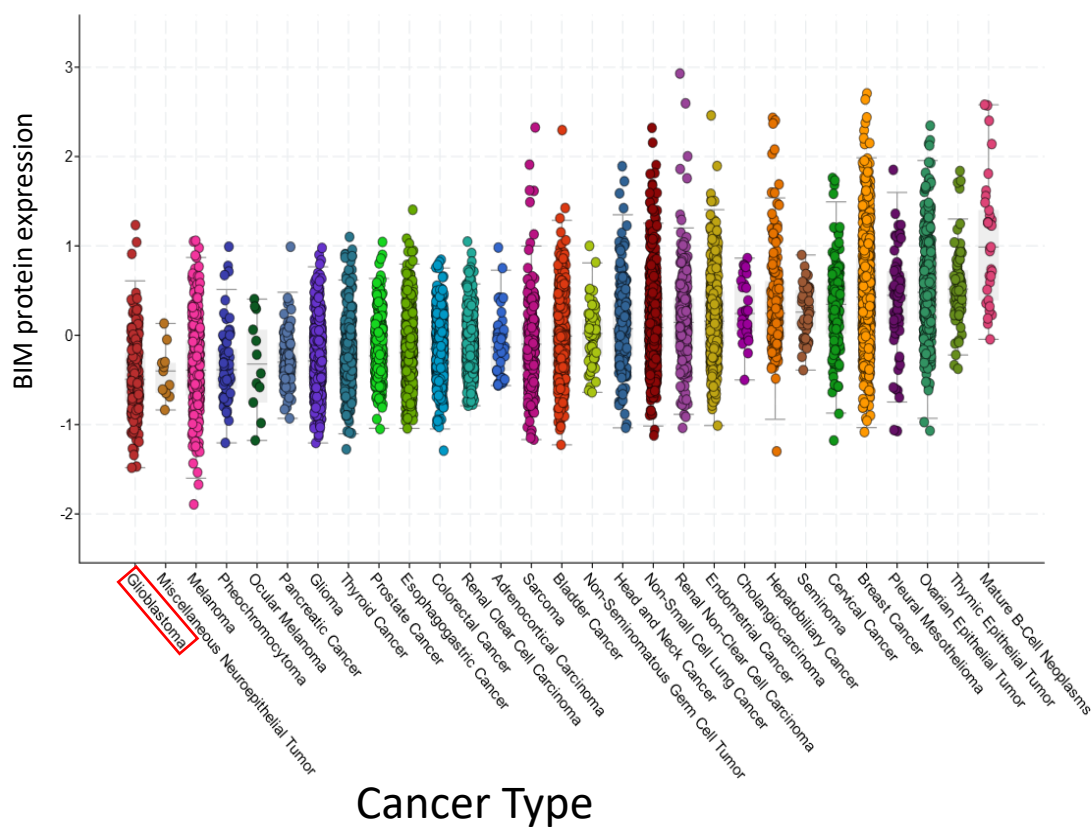

## B. BIM/BCL2L11 mRNA

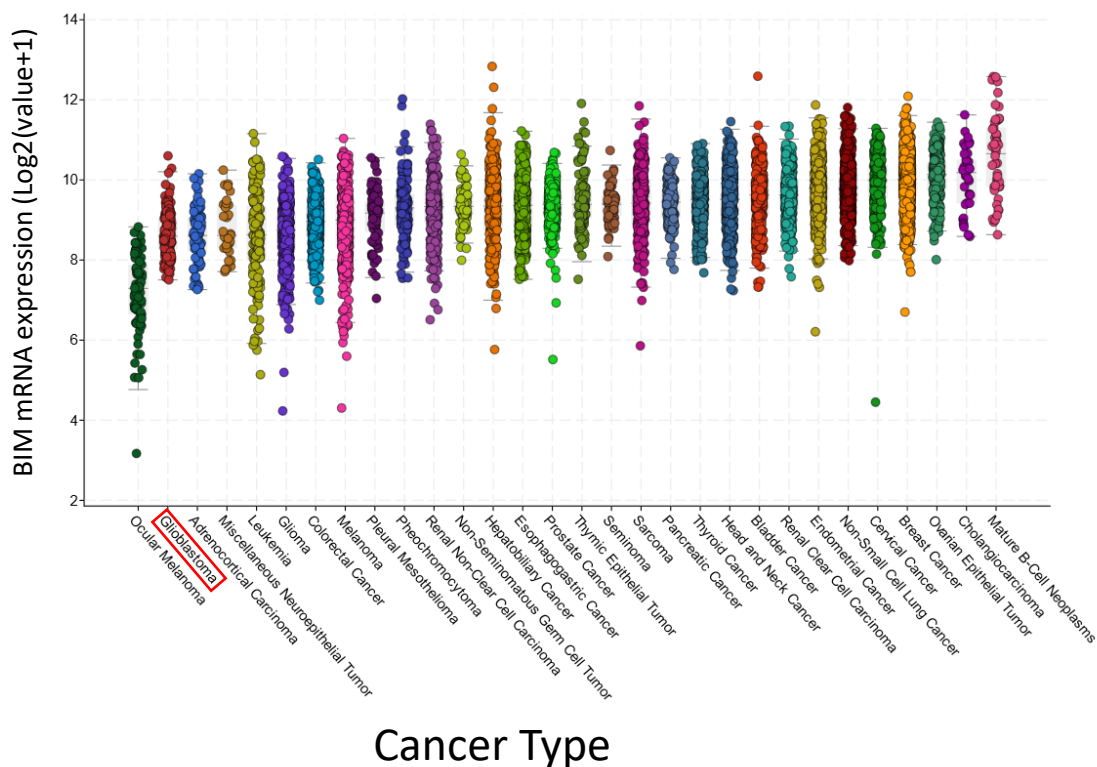

**Figure S6. Relatively low expression of BIM in patient GBM tumors.** A. BIM/BCL2L11 protein and B. mRNA expression in patient tumors. Data captured from TCGA cBioPortal. Cancer types are arranged by expression level.

A.

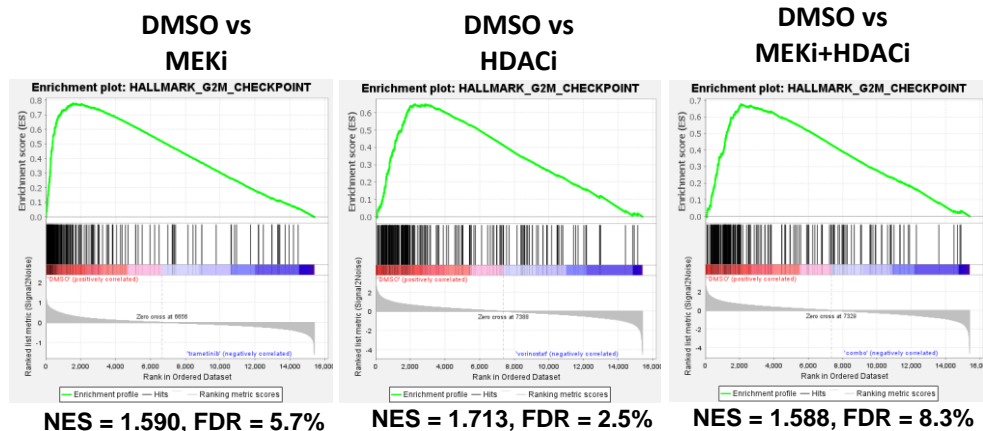

B.

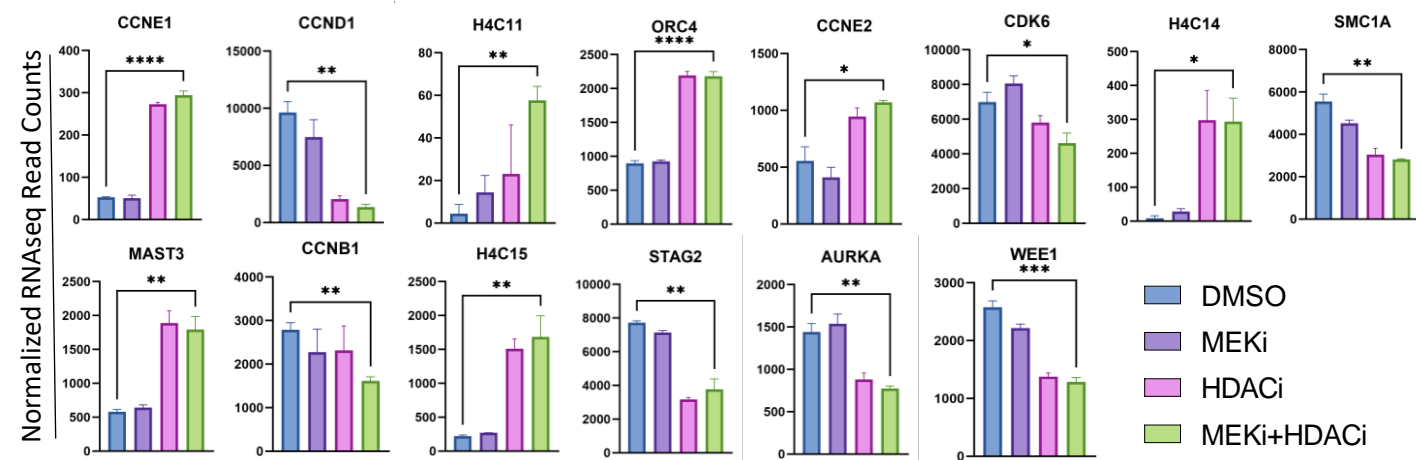

C.

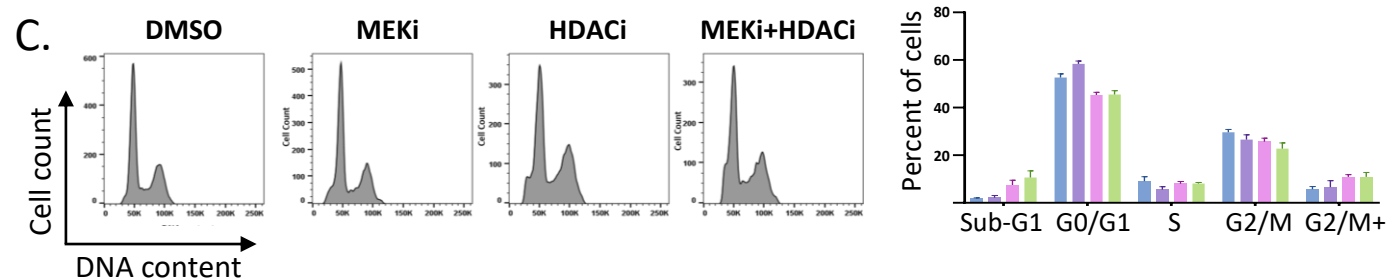

D.

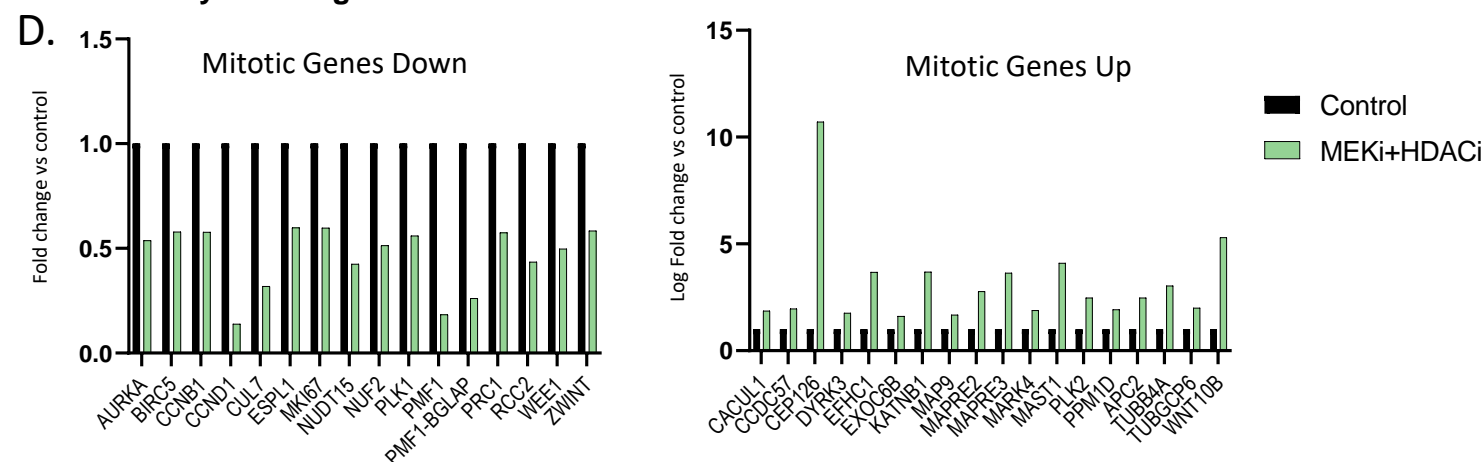

**Figure S7. MEKi+HDACi treatment of GSCs altered S phase and mitotic cell cycle factors.** **A.** Hallmark gene expression analysis for G2/M gene expression changes (NES, normalized enrichment score; FDR, false discovery rate) and normalized RNA-sequencing counts for selected cell cycle genes in GSC12 glioblastoma cells following 24 h incubation with 25 nM MEKi and/or 2.5  $\mu$ M HDACi. Data are means + SEM (n=3).  $p = * \leq 0.05$ ;  $** \leq 0.01$   $*** \leq 0.001$   $**** \leq 0.0001$ , t-test. **B.** mRNA levels of key cell cycle genes after 24 h treatment with MEKi+HDACi in GSC12 cells. Data are means + SEM from 3 independent replicates. **C.** Propidium iodide (PI) flow cytometry analysis of cell cycle for cells treated with MEKi [25 nM trametinib (TR)] and/or HDACi [2.5  $\mu$ M vorinostat]. Graphs portray the mean + SEM for the percentage of cells in G1, S, or G2/M phases from three independent experiments. **D.** mRNA levels of key mitotic genes after 24 h treatment with MEKi+HDACi in GSC12 cells. Data are means from 3 independent replicates.

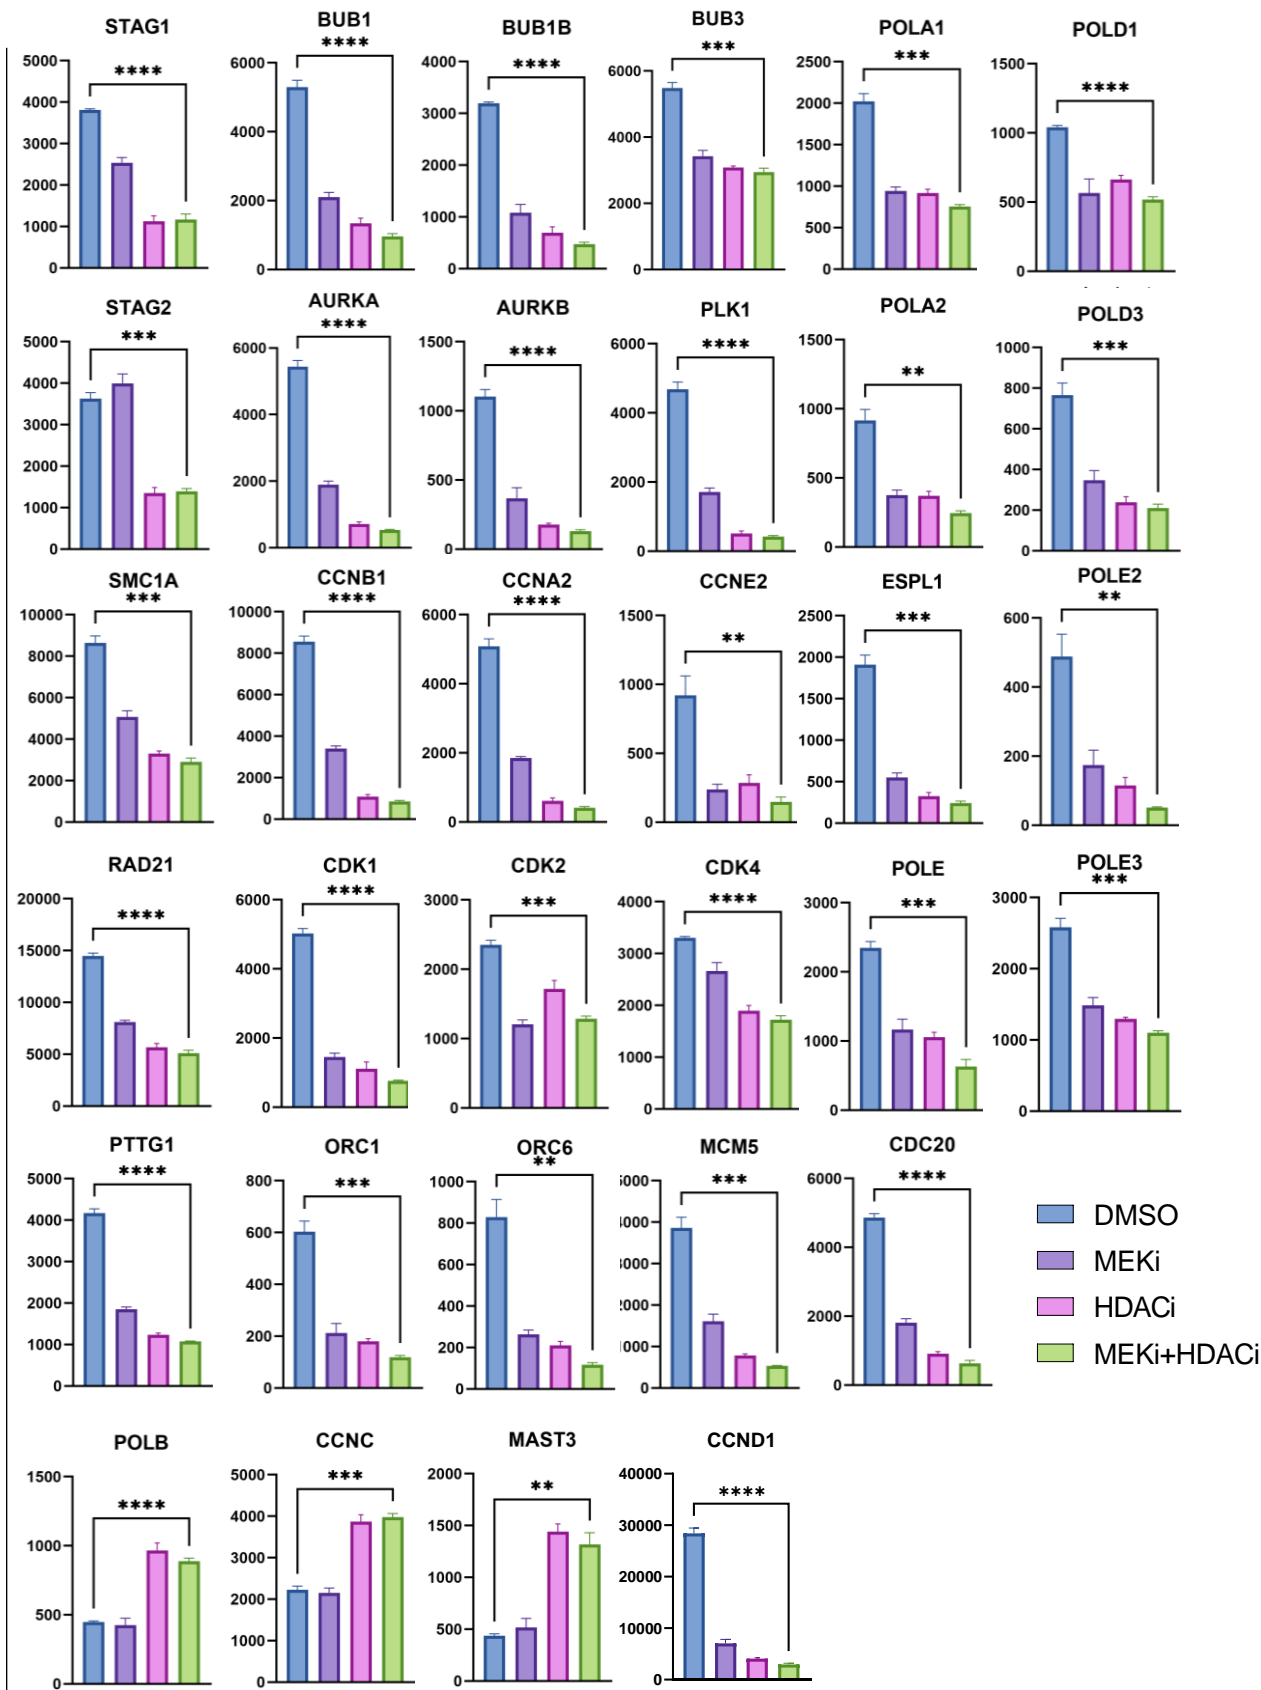

**Figure S8. Combinatorial effects of MEKi + HDACi on expression of select cell cycle gene expression in U87 cells.** Normalized RNA-sequencing counts for cell cycle genes in U87 glioblastoma cells following 24 h incubation with 25 nM MEKi and/or 2.5  $\mu$ M HDACi. Data are means + SEM (n=3). p = \* $\leq$ 0.05; \*\* $\leq$ 0.01 \*\*\* $\leq$ 0.001 \*\*\*\* $\leq$ 0.0001, t-test.



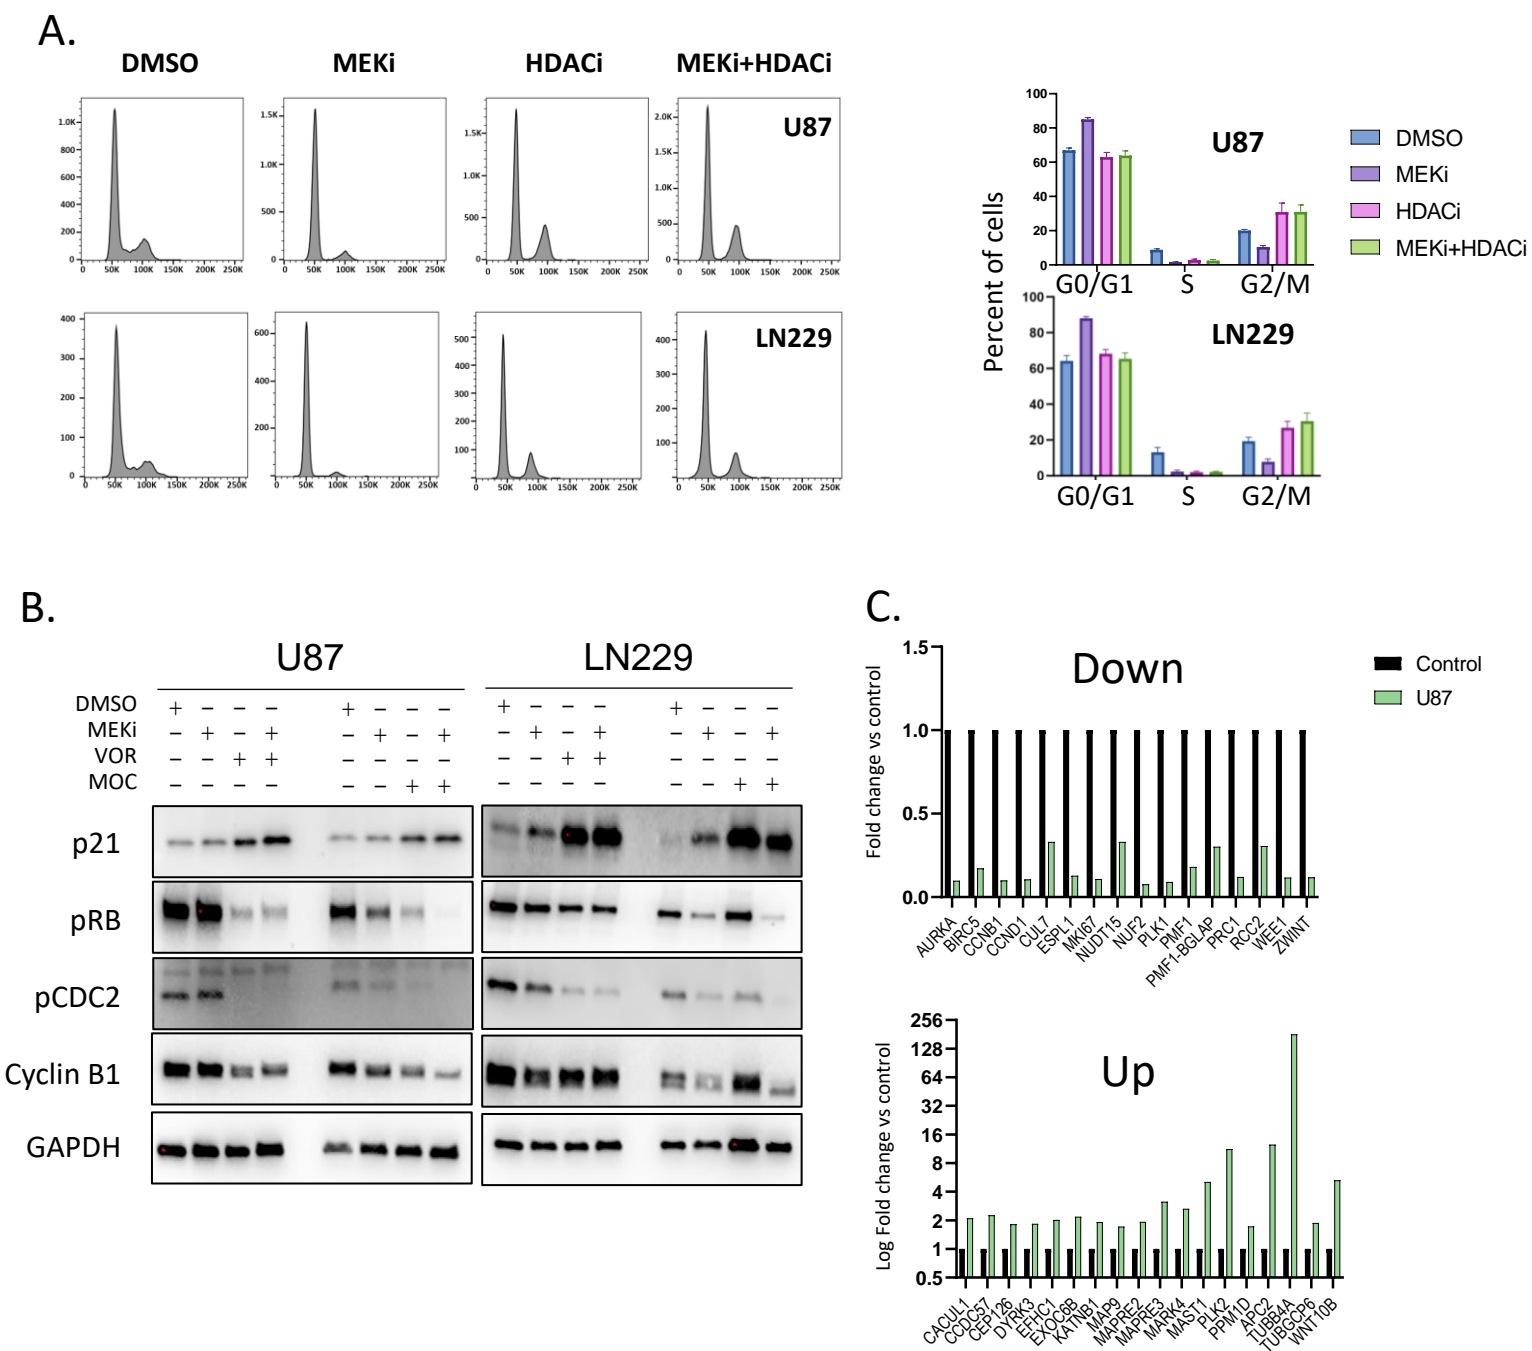

**Figure S9. MEKi+HDACi treatment of GBM cells altered S phase and mitotic cell cycle factors.** **A.** Propidium iodide (PI) flow cytometry analysis of cell cycle for cells treated with MEKi [25 nM trametinib (TR)] and/or HDACi [2.5  $\mu$ M vorinostat]. Graphs portray the mean + SEM for the percentage of cells in G1, S, or G2/M phases from three independent experiments. **B.** Western blot for cell cycle markers in U87 and LN229 cells treated with MEKi and/or HDACi [2.5  $\mu$ M vorinostat] or 1  $\mu$ M mocetinostat. Cells were treated for 24 h. GAPDH protein was used as a loading control and for normalization. Phosphorylation of the RB protein (pRB) is a critical regulatory step in allowing cell cycle progression from G1 into S phase. p21 acts an inhibitor of cell cycle progression. Cyclin B1 promotes G2/M phase progression and is degraded at the end of mitosis. Phosphorylation of CDC2 is required for G2/M phase progression. **C.** mRNA levels of key mitotic genes after 24 h treatment with MEKi+HDACi in U87 cells. Data are means from 3 independent replicates.

**A.**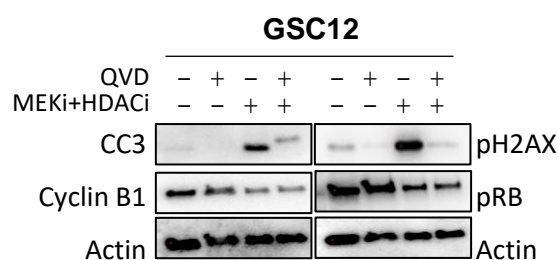**B.**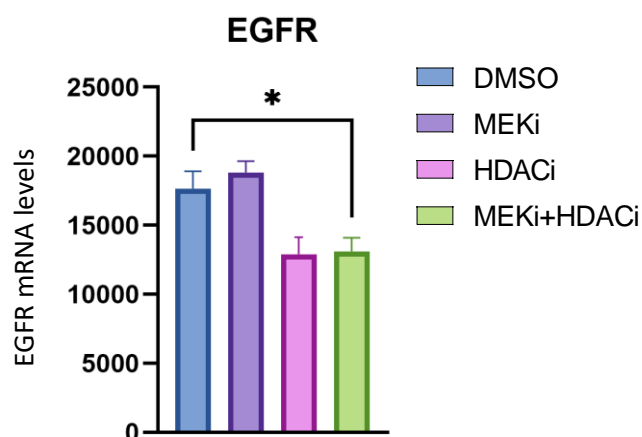**C.**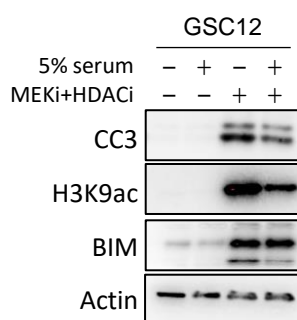**D.**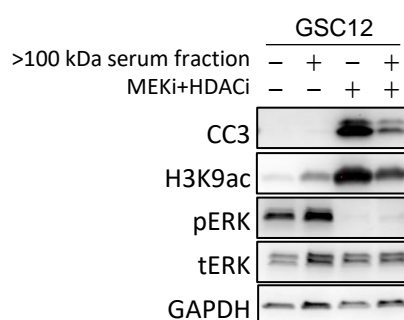**E.**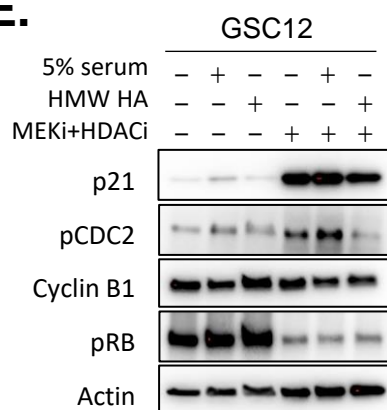

**Figure S10. GSC apoptosis induced by MEKi + HDACi does not arise from DNA damage but associates with repressed EGFR mRNA and is rescued by serum factors.** **A.** Cell cycle protein expression after MEKi+HDACi with or without blocking apoptosis/caspase activation using 50  $\mu$ M Q-VD-OPh. The left and right images are from separate immunoblots of the sample samples. **B.** EGFR mRNA expression from RNAseq. Data are means + SEM ( $n = 3$ ).  $p = * \leq 0.05$ , t-test. **C.** GSC12 cells were treated with MEKi+HDACi (25 nM trametinib, 2.5  $\mu$ M vorinostat) for 24 h with or without 5% serum followed by analysis of apoptosis (CC3), histone acetylation (H3K9ac) and the pro-apoptotic BIM. Actin protein was used as a loading control. **D.** GSC12 cells were drug treated as in A with or without serum fractionated for >100 kDa components and added at 5%. CC3, histone acetylation, ERK activated (pERK), total ERK (tERK) were monitored for changes. **E.** Representative data for cells treated with MEKi+HDACi for 24 h with or without 5% serum or HMW HA and immunoblotted for cell cycle factors. Data are from the same membrane as shown in Fig 3C.
